# Supplementary material for: A cell permeable Cr3+ selective chemosensor and its application in living cell imaging
Source: Royal Society of Chemistry journal article supplement (doi:10.1039/c3ra43305f), 2013-01-01
Supplement: c3ra43305f.pdf [file c3ra43305f.pdf]

## Supporting Information

For

### A Cr<sup>3+</sup> Selective Dual Turn-on Chemosensor And Its Application In Living Cell Imaging

Manjira Mukherjee,<sup>1</sup> Buddhadeb Sen,<sup>1</sup> Siddhartha Pal,<sup>1</sup> Maninder S. Hundal,<sup>2</sup> Sushil Kumar Mandal,<sup>3</sup> Anisur Rahman Khuda-Bukhsh,<sup>3</sup> and Pabitra Chattopadhyay<sup>1\*</sup>

<sup>1</sup>Department of Chemistry, Burdwan University, Golapbag, Burdwan-713104, West Bengal, India, E-mail: pabitracc@yahoo.com

<sup>2</sup>Department of Chemistry, Guru Nanak Dev University, Amritsar-143005, India

<sup>3</sup>Cytogenetics and Molecular Biology Laboratory, Department of Zoology, University of Kalyani, Kalyani 741235, India

## CONTENTS

1. **Fig. s1** <sup>1</sup>H NMR spectrum of H<sub>2</sub>L<sup>1</sup> in DMSO-d<sub>6</sub> (expanded aromatic region for clarity)
2. **Fig.s2** Mass spectrum of 2-(5,6-dihydro-benzo[4,5]imidazo[1,2-c]quinazolin-6-yl)-quinolin-8-ol (H<sub>2</sub>L<sup>1</sup>)
3. **Fig. s3** IR spectrum of H<sub>2</sub>L<sup>1</sup>
4. **Fig. s4** IR spectrum of the chromium(III) complex, [Cr(L)(NO<sub>3</sub>)(H<sub>2</sub>O)]
5. **Fig. s5**. Mass spectrum of the chromium(III) complex, [Cr(L)(NO<sub>3</sub>)(H<sub>2</sub>O)]
6. **Fig.s6** Absorption and emission spectra of 12.5 μM of the probe in 100 mM HEPES buffer (ethanol/water 1:5, v/v) at 25°C
7. **Fig. s7** Fluorescence colour of the probe in absence and presence of Cr<sup>3+</sup> ion
8. **Fig.s8** Job's plot analysis showing maximum emission at 1:1 ratio [H<sub>2</sub>L: Cr<sup>3+</sup>]
9. **Fig. s9** Visual colour change of the probe due to the addition of Cr<sup>3+</sup> ion: colour of the probe in absence and presence of Cr<sup>3+</sup> ion
10. **Fig.s10** Fluorescence spectra of H<sub>2</sub>L<sup>1</sup> (10 μM), H<sub>2</sub>L<sup>1</sup> + Cr<sup>3+</sup> (10 μM) and H<sub>2</sub>L<sup>1</sup> (10 μM) + M (200 μM), where M = Na<sup>+</sup>, K<sup>+</sup>, Ca<sup>2+</sup>, Mg<sup>2+</sup>, Ag<sup>+</sup>, Mn<sup>2+</sup>, Hg<sup>2+</sup>, Fe<sup>3+</sup>, Co<sup>2+</sup>, Ni<sup>2+</sup>, Cu<sup>2+</sup>, Zn<sup>2+</sup>, Cd<sup>2+</sup> and Pb<sup>2+</sup> (λ<sub>em</sub>: 426 nm, λ<sub>ex</sub>: 370 nm, in ethanol-HEPES buffer (1:5).
11. **Fig. s11** Linearity range: 3.6 x 10<sup>-7</sup> to 4.5 x 10<sup>-5</sup> mol.L<sup>-1</sup>
12. **Fig. s12** Cytotoxic effect of H<sub>2</sub>L<sup>1</sup> (5, 10, 25, 50 and 100 μM) in HeLa cells incubated for 8 h
13. Table s1 The resulting data of time-resolved fluorescence lifetime measurements

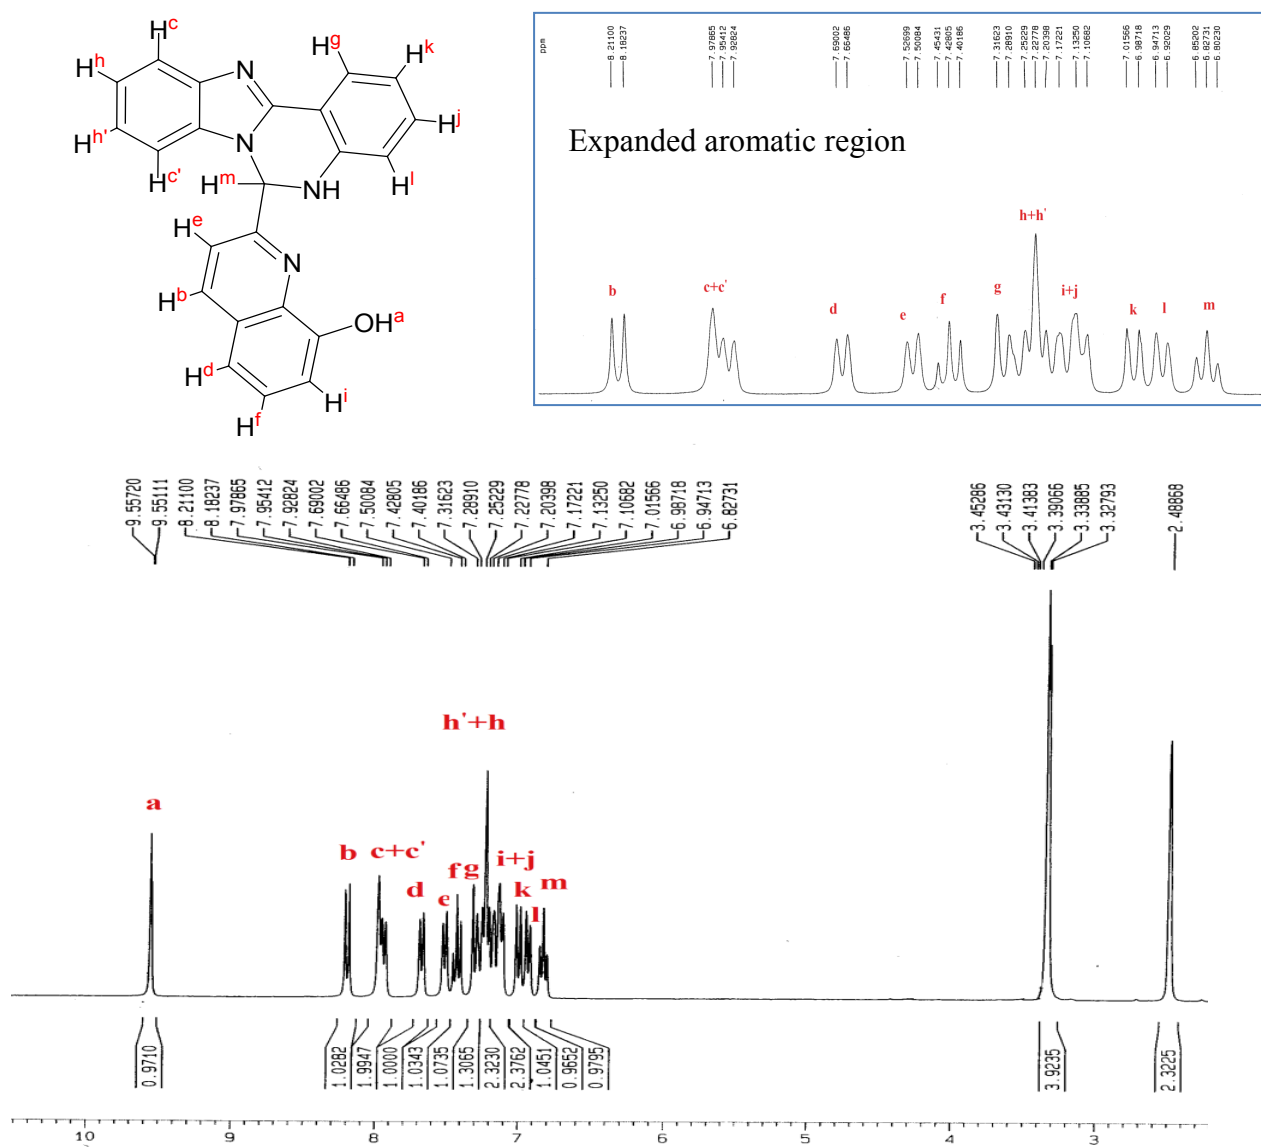

Fig. s1  $^1\text{H}$  NMR spectrum of  $\text{H}_2\text{L}^1$  in  $\text{DMSO-d}_6$

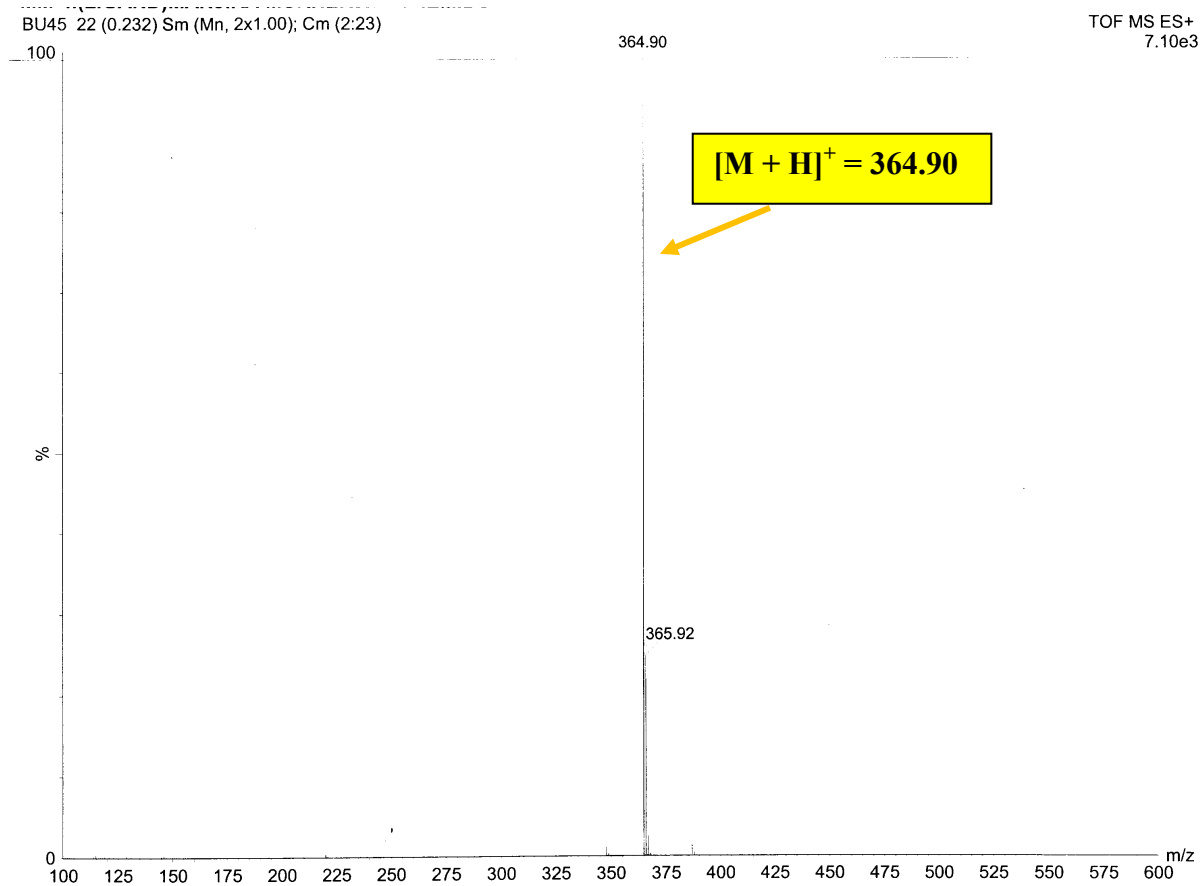

**Fig. s2** Mass spectrum of 2-(5,6-dihydro-benzo[4,5]imidazo[1,2-c]quinazolin-6-yl)-quinolin-8-ol (H<sub>2</sub>L<sup>1</sup>)

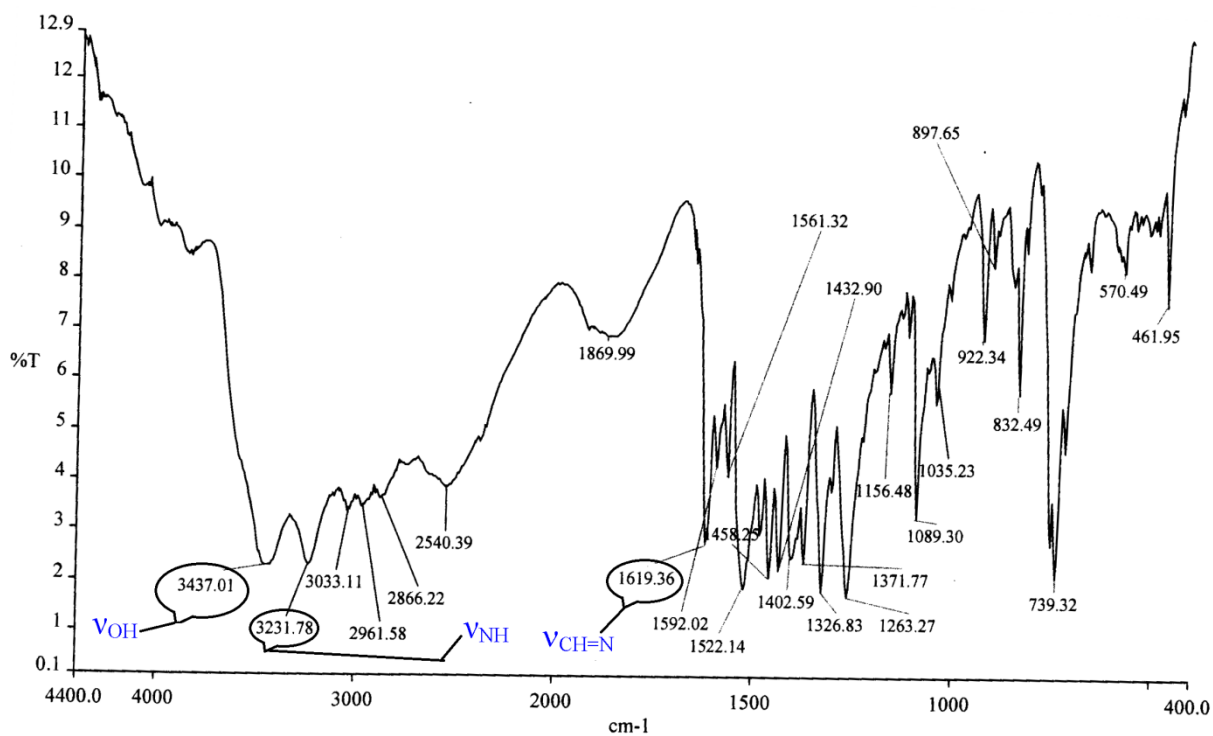

Fig. s3 IR spectrum of H<sub>2</sub>L<sup>1</sup>

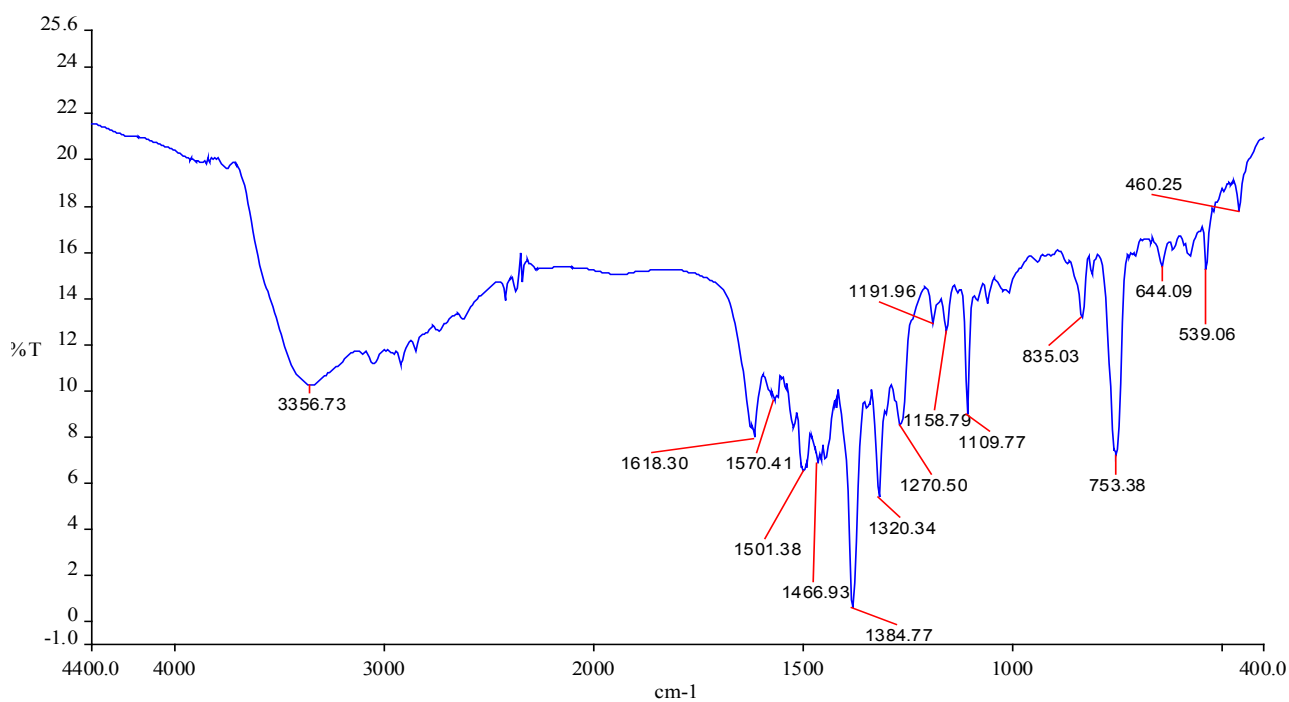

Fig. s4 IR spectrum of the chromium(III) complex, [Cr(L)(NO<sub>3</sub>)(H<sub>2</sub>O)]

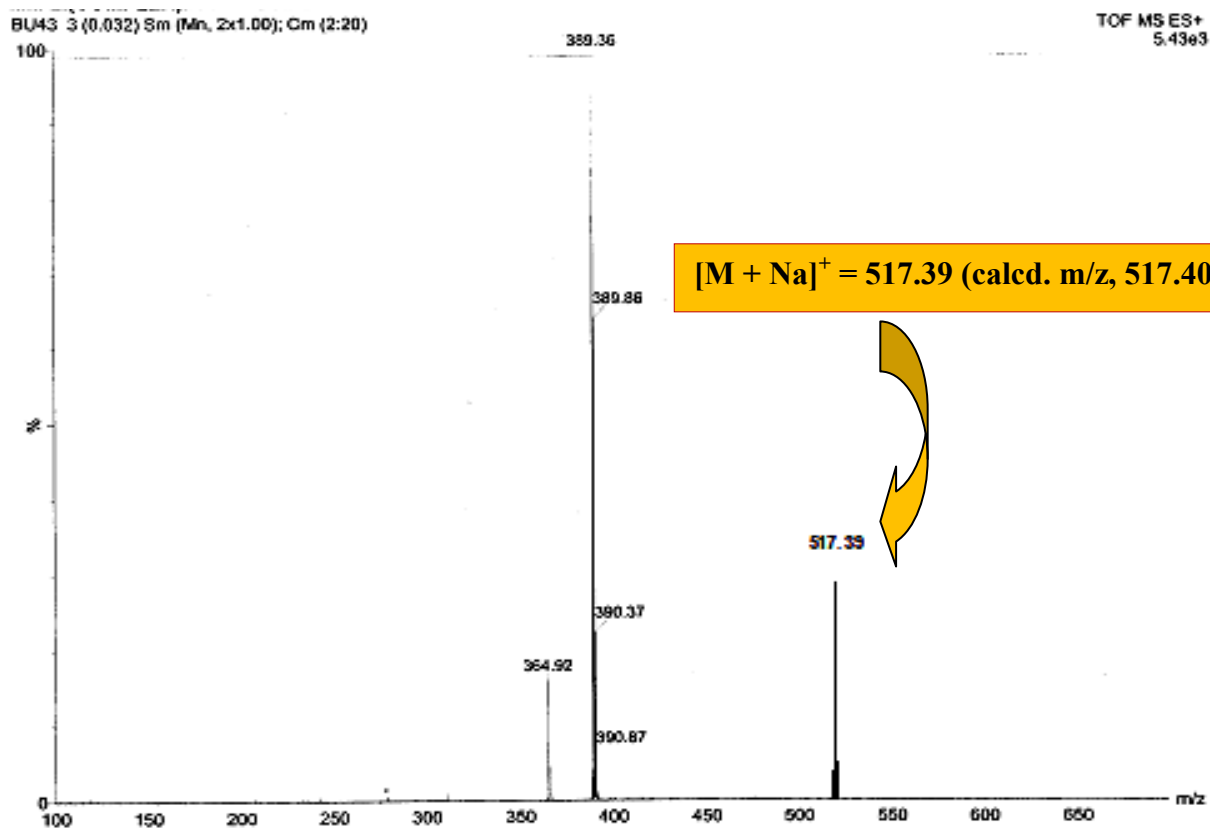

Fig. s5 Mass spectrum of the chromium(III) complex,  $[Cr(L)(NO_3)(H_2O)]$

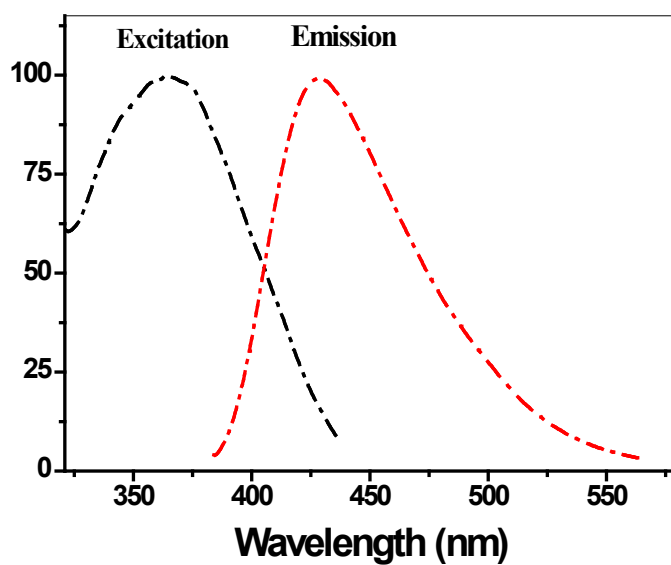

Fig.s6 Absorption and emission spectra of 12.5  $\mu$ M of the probe in 100 mM HEPES buffer (ethanol/water 1:5, v/v) at 25°C

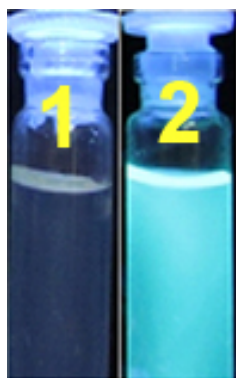

**Fig. s7** Fluorescence colour of the probe in absence (1) and presence (2) of  $\text{Cr}^{3+}$  ion

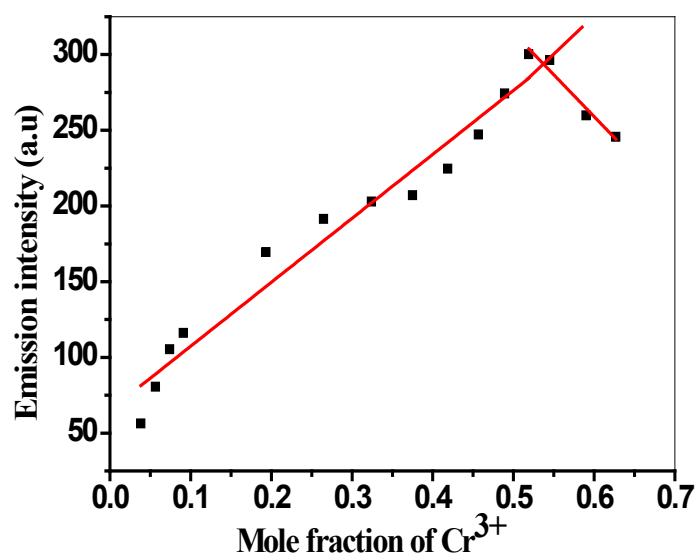

**Fig.s8** Job's plot analysis showing maximum emission at 1:1 ratio [ $\text{H}_2\text{L}$ :  $\text{Cr}^{3+}$ ]

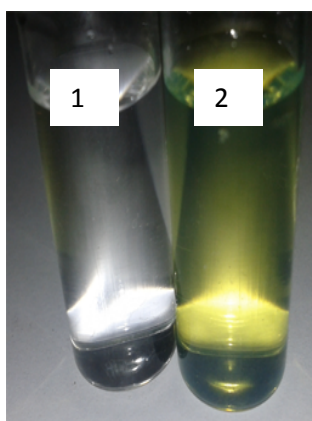

**Fig. s9** Visual colour change of the probe due to the addition of  $\text{Cr}^{3+}$  ion: colour of the probe in absence (1) and presence (2) of  $\text{Cr}^{3+}$  ion

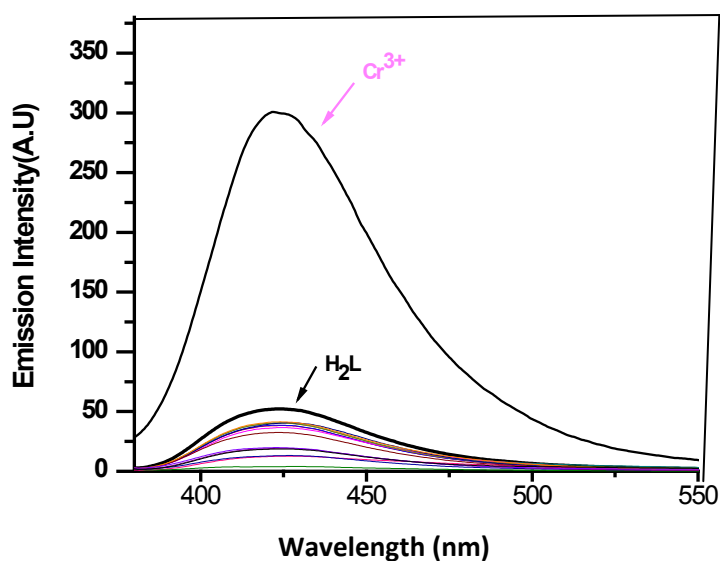

**Fig.s10** Fluorescence spectra of H<sub>2</sub>L<sup>1</sup> (10 μM), H<sub>2</sub>L<sup>1</sup> + Cr<sup>3+</sup> (10 μM) and H<sub>2</sub>L<sup>1</sup> (10 μM) + M (200 μM), where M = Na<sup>+</sup>, K<sup>+</sup>, Ca<sup>2+</sup>, Mg<sup>2+</sup>, Ag<sup>+</sup>, Mn<sup>2+</sup>, Hg<sup>2+</sup>, Fe<sup>3+</sup>, Co<sup>2+</sup>, Ni<sup>2+</sup>, Cu<sup>2+</sup>, Zn<sup>2+</sup>, Cd<sup>2+</sup> and Pb<sup>2+</sup> (λ<sub>em</sub>: 426 nm, λ<sub>ex</sub>: 370 nm, in ethanol-HEPES buffer (1:5)).

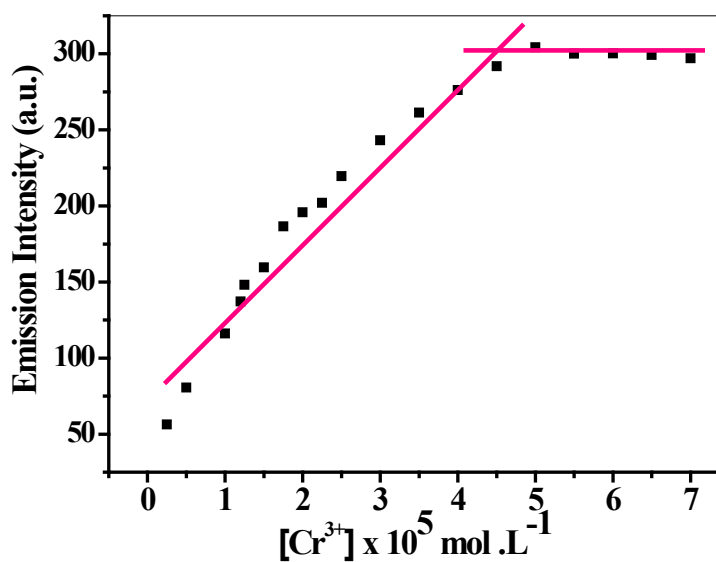

**Fig. s11** Linearity range: 3.6 x 10<sup>-7</sup> to 4.5 x 10<sup>-5</sup> mol.L<sup>-1</sup>

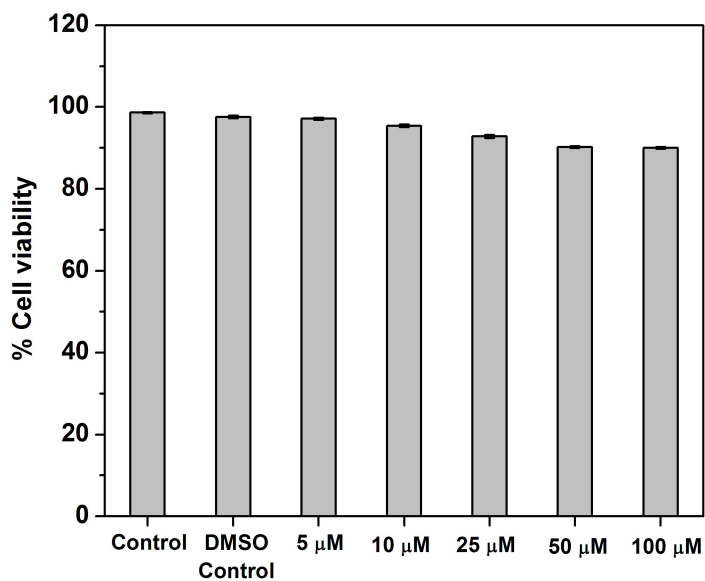

**Fig. s12** Cytotoxic effect of  $H_2L^1$  (5, 10, 25, 50 and 100  $\mu M$ ) in HeLa cells incubated for 8 h

Table s1 The resulting data of time-resolved fluorescence lifetime measurements

| System                     | $\tau_1$ (ns) | $B_1$ | $\tau_2$ (ns) | $B_2$ | $\tau_{av}$ (ns)* | $\chi^2$ |
|----------------------------|---------------|-------|---------------|-------|-------------------|----------|
| $H_2L^1$                   | 0.107         | 78.49 | 5.231         | 21.51 | 1.209             | 1.001    |
| $H_2L^1 + Cr^{3+}$ (0.5eq) | 0.086         | 28.54 | 6.554         | 71.46 | 4.708             | 1.006    |
| $H_2L^1 + Cr^{3+}$ (1eq)   | 0.118         | 12.43 | 6.264         | 87.57 | 5.500             | 1.011    |

$$*\tau_{av} = [(\tau_1 \times B_1) + \tau_2 \times B_2] / 100$$
